# Supplementary material for: A large areal capacitance structural supercapacitor with a 3D rGO@MnO2 foam electrode and polyacrylic acid–Portland cement–KOH electrolyte
Source: Royal Society of Chemistry journal article supplement (doi:10.1039/d0ta03109g), 2020-01-01
Supplement: d0ta03109g1.pdf [file d0ta03109g1.pdf]

## Large Areal Capacitance Structural Supercapacitor with 3D rGO@MnO<sub>2</sub> Foam Electrode and Polyacrylic Acid-Portland Cement-KOH Electrolyte

Cuiqin Fang and Dong Zhang\*

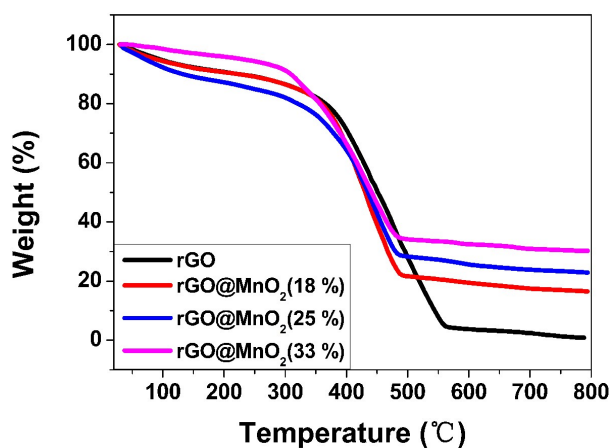

Fig. S1 TGA curves of rGO and rGO@MnO<sub>2</sub> foams with various MnO<sub>2</sub> nanosheets mass loadings.

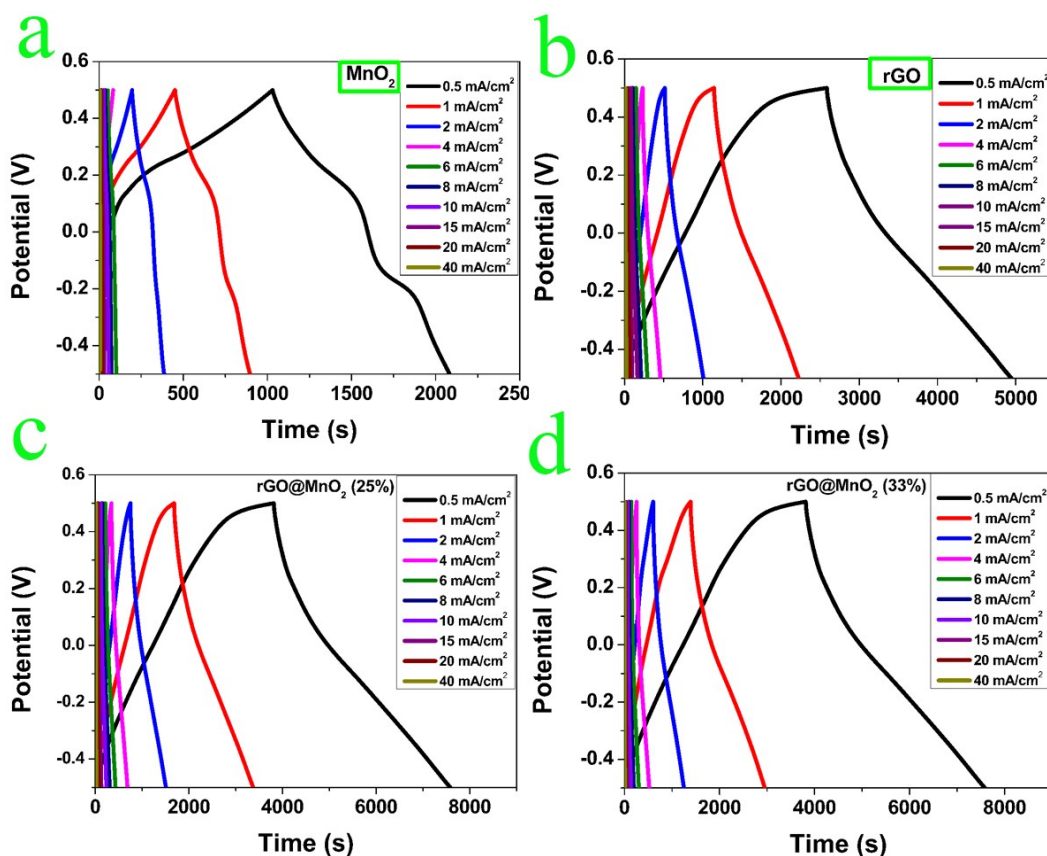

Fig. S2 GCD curves at different current densities for MnO<sub>2</sub>, rGO, rGO@MnO<sub>2</sub> (25%) and rGO@MnO<sub>2</sub> (33%) electrodes.

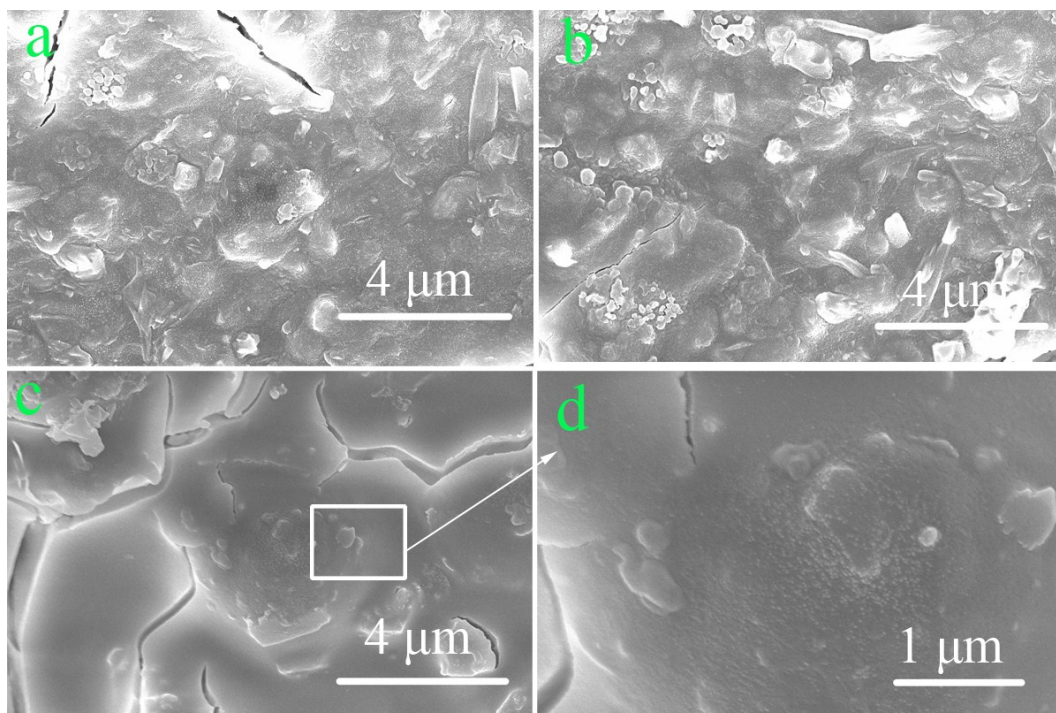

Fig. S3 SEM images of PAA-Portland cement-KOH electrolytes with various PAA contents. (a) 2 wt%, (b) 4 wt%, (c) 8 wt% (low-magnification), (d) 8wt% (high-magnification).

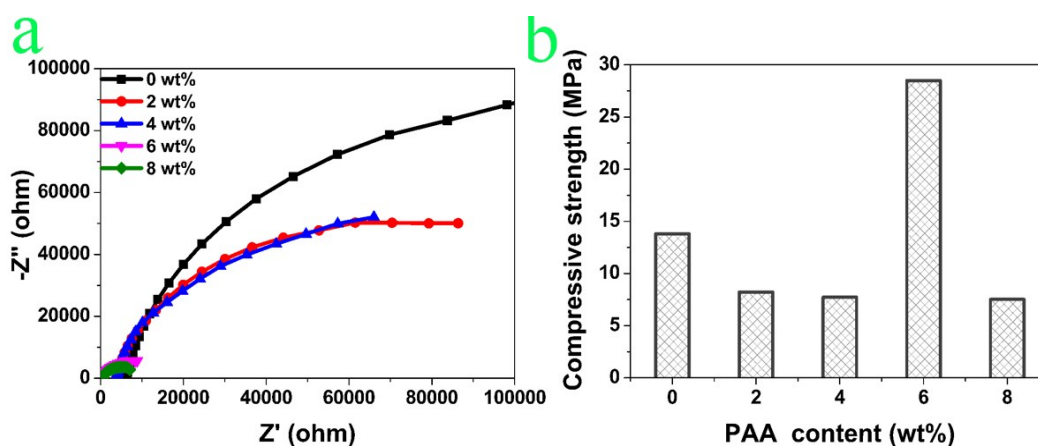

Fig. S4 (a) EIS, (b) Compressive strength of PAA-Portland cement-KOH electrolytes with various PAA contents.

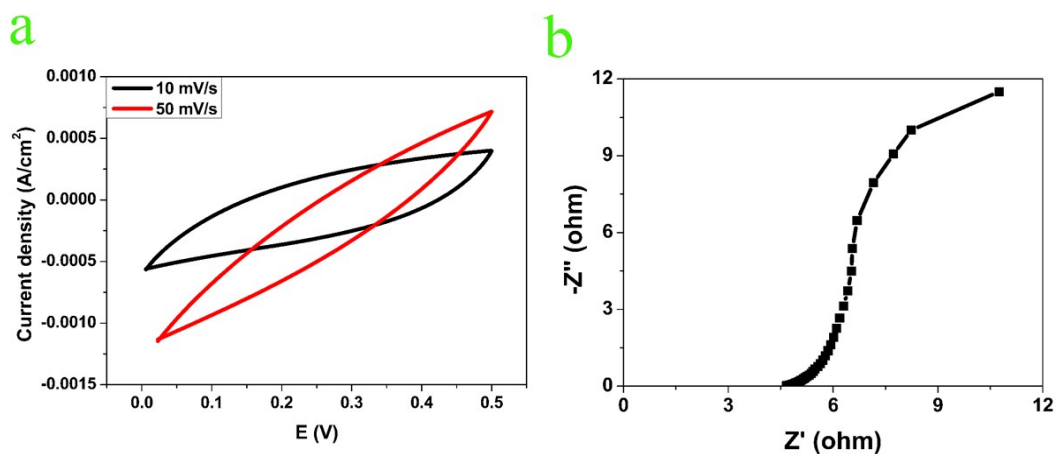

Fig. S5 (a) CV curves and (b) EIS curve of the structural supercapacitor cell.
